# Supplementary material for: Altering the influence of ceria oxygen vacancies in Ni/CexSiyO2for photothermal CO2methanation
Source: Royal Society of Chemistry journal article supplement (doi:10.1039/d1cy00136a), 2021-01-01
Supplement: d1cy00136a1.pdf [file d1cy00136a1.pdf]

## Supplementary Information

### **Altering the influence of ceria oxygen vacancies in Ni/Ce<sub>x</sub>Si<sub>y</sub>O<sub>2</sub> for photothermal CO<sub>2</sub> methanation**

Salina Jantarang, Emma C. Lovell\*, Tze Hao Tan, Bingqiao Xie, Jason Scott\*, Rose Amal

Particles and Catalysis Research Group, School of Chemical Engineering, The University of New South Wales, Sydney, NSW 2052, Australia

\* Corresponding authors: [e.lovell@unsw.edu.au](mailto:e.lovell@unsw.edu.au), [jason.scott@unsw.edu.au](mailto:jason.scott@unsw.edu.au)

## List of Figures and Tables

|                                                                                                                                                                                                                                                                                                                                                                                                                                                                                                                                                                                                                                                                                                                                                   |    |
|---------------------------------------------------------------------------------------------------------------------------------------------------------------------------------------------------------------------------------------------------------------------------------------------------------------------------------------------------------------------------------------------------------------------------------------------------------------------------------------------------------------------------------------------------------------------------------------------------------------------------------------------------------------------------------------------------------------------------------------------------|----|
| <b>Figure S1</b> XRD patterns of $Ce_xSi_yO_2$ from (a) $20^\circ - 100^\circ$ and (b) magnified spectra between $26^\circ - 32^\circ$ . The Miller indices of $CeO_2$ were referenced to JCPDS: 01-083-9465. The XRD patterns of (c) reduced and passivated $Ni/Ce_xSi_yO_2$ were recorded from $20^\circ - 100^\circ$ ; JCPDS: 04-016-4592 (Ni). .1                                                                                                                                                                                                                                                                                                                                                                                             | 1  |
| <b>Figure S2</b> (a) UV-vis absorbance of $Ce_xSi_yO_2$ from 200 – 800 nm. (b) UV-vis-NIR absorbance of reduced and passivated $Ni/Ce_xSi_yO_2$ from 200 – 2000 nm. The absorption peak at 830 nm is due to the instrument. ....1                                                                                                                                                                                                                                                                                                                                                                                                                                                                                                                 | 1  |
| <b>Figure S3</b> Thermogravimetric analysis of $SiO_2$ showing weight loss over the range $50^\circ C - 800^\circ C$ ...2                                                                                                                                                                                                                                                                                                                                                                                                                                                                                                                                                                                                                         | 2  |
| <b>Figure S4</b> Raman spectra of (a) as-prepared and (b) reduced $Ce_xSi_yO_2$ . Inset shows magnified spectra over the range $500 - 700\text{ cm}^{-1}$ . Peak at approximately $464\text{ cm}^{-1}$ corresponds to the $F_{2g}$ mode of $CeO_2$ (symmetrical stretching of Ce-O) while the broad peak between $500\text{ cm}^{-1}$ to $600\text{ cm}^{-1}$ confirms the presence of oxygen vacancies. <sup>1-5</sup> EPR spectra of (c) as-prepared $Ce_xSi_yO_2$ , (d) reduced $Ce_xSi_yO_2$ and (e) $Ce_{0.2}Si_{0.8}O_2$ without baseline correction, only observed for as-prepared and reduced $Ce_{0.2}Si_{0.8}O_2$ ....3                                                                                                                 | 3  |
| <b>Figure S5</b> FTIR spectra of as-prepared and reduced (R) $Ce_xSi_yO_2$ from (a,c) $4500 - 2500\text{ cm}^{-1}$ and (b,d) $2000 - 650\text{ cm}^{-1}$ , respectively. The broad peak region between $3750\text{ cm}^{-1} - 2750\text{ cm}^{-1}$ for both $CeO_2$ and $SiO_2$ indicate water adsorption. <sup>1,6,7</sup> In the $CeO_2$ spectrum, the peak at $1319\text{ cm}^{-1}$ (C) corresponds to stretching vibrational mode Ce-O-Ce <sup>8</sup> , the peak at $1628\text{ cm}^{-1}$ (A) is attributed to the O-H deformation vibration <sup>8</sup> . The $SiO_2$ sampled exhibited peaks at (D) $1049\text{ cm}^{-1}$ , asymmetric stretch (Si-O-Si), and (G) $801\text{ cm}^{-1}$ , symmetric stretch (Si-O-Si). <sup>7</sup> .....4 | 4  |
| <b>Figure S6</b> XPS spectra of (a) Ni 2p; (b) Ce 3d; (c) Si 2p; (d) O 1s; and (e) C 1s for $Ni/Ce_xSi_yO_2$ . With respect to the Ce 3d peaks, $Ce^{3+}$ (red labels) are represented by $u^0/v^0$ and $u^2/v^2$ ; $Ce^{4+}$ (black labels) are represented by $u/v$ , $u^2/v^2$ , and $u^3/v^3$ . <sup>11,12</sup> The $Ni/Ce_xSi_yO_2$ were reduced and passivated prior to analysis. The deconvolutions of O 1s <sup>13,14</sup> and C 1s <sup>9,15,16</sup> were referenced to literature.....6                                                                                                                                                                                                                                              | 6  |
| <b>Figure S7</b> TEM and EDS images of (a) $Ni/CeO_2$ and (b-c) $Ni/Ce_{0.9}Si_{0.1}O_2$ . The figures include (1) dark field images, (2) bright field images, and (3) EDS mapping. ....8                                                                                                                                                                                                                                                                                                                                                                                                                                                                                                                                                         | 8  |
| <b>Figure S8</b> XRD pattern of (a) $Ni/SiO_2$ and (b) $Ni/CeO_2$ . The spent catalysts were collected after the decoupled activity tests (i) thermal and ii) photo and thermal) under flow conditions. The reduced and passivated catalysts ( $Ni/CeO_2$ and $Ni/SiO_2$ ) are included for comparison.....9                                                                                                                                                                                                                                                                                                                                                                                                                                      | 9  |
| <b>Figure S9</b> DRIFTS spectra from $50^\circ C - 400^\circ C$ for $Ni/CeO_2$ and $Ni/Ce_{0.9}Si_{0.1}O_2$ from (a, c) $4000 - 2750\text{ cm}^{-1}$ and (b, d) $2250 - 1200\text{ cm}^{-1}$ . ....10                                                                                                                                                                                                                                                                                                                                                                                                                                                                                                                                             | 10 |
| <b>Figure S10</b> DRIFTS transient spectra of (a) $Ni/CeO_2$ and (b) $Ni/Ce_{0.9}Si_{0.1}O_2$ at $200^\circ C$ under $N_2$ purging and $H_2$ flow after $N_2$ purge (purple lines) from $2600 - 1000\text{ cm}^{-1}$ . The spectra include the first five minutes of the gas transition stage. The $CO_2$ peak intensity and hydrogen carbonate peak ( $1617\text{ cm}^{-1}$ ) of (a) $Ni/CeO_2$ decrease under $N_2$ . In the case of (b) $Ni/Ce_{0.9}Si_{0.1}O_2$ , intermediates were retained under the $N_2$ purge. ....11                                                                                                                                                                                                                   | 11 |
| <b>Figure S11</b> DRIFTS transient spectra at $200^\circ C$ under $N_2$ purging at $4000 - 2250\text{ cm}^{-1}$ for (a) $Ni/CeO_2$ and (b) $Ni/Ce_{0.9}Si_{0.1}O_2$ collected under 1 min intervals. A decrease in $CO_2$ intensity of both samples were observed with time increase.....11                                                                                                                                                                                                                                                                                                                                                                                                                                                       | 11 |
| <b>Figure S12</b> $Ni/CeO_2$ and $Ni/Ce_{0.9}Si_{0.1}O_2$ : DRIFTS transient spectra at $50^\circ C$ after introduction of $CO_2$ and $H_2$ at ratio of 1:4, diluted with $N_2$ (a,c) $4000 - 2250\text{ cm}^{-1}$ and (b,d) $2200 - 1000\text{ cm}^{-1}$ . The spectra was collected under 1 min intervals.....12                                                                                                                                                                                                                                                                                                                                                                                                                                | 12 |

**Table S1** Actual Ni loading as determined from ICP-OES of as-prepared  $Ni/Ce_xSi_yO_2$ . The Ni catalysts have a nominal loading of 10 wt.%. ....2

**Table S2** Crystallite size of Ni and catalyst support for reduced and passivated and selected spent catalysts. The spent catalysts were collected after the decoupled activity tests under flow conditions. 8

## Catalyst Properties

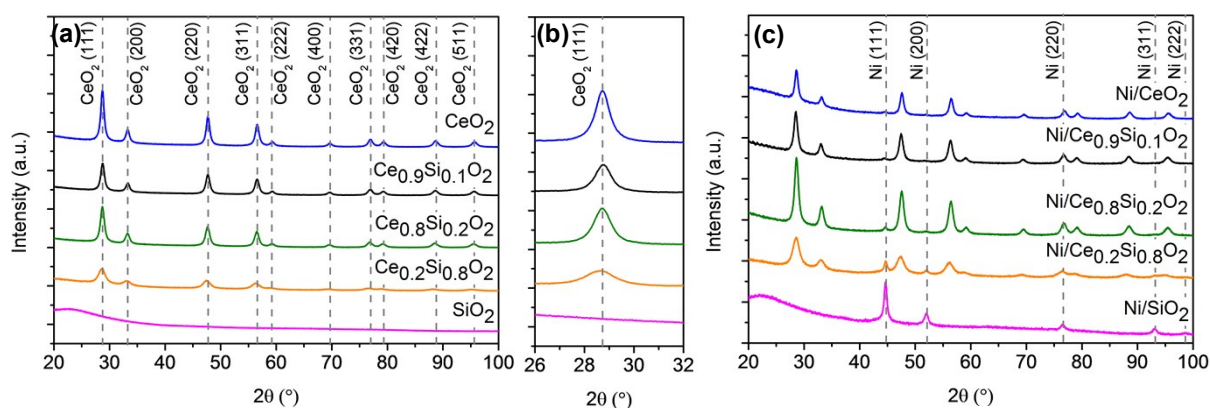

**Figure S1** XRD patterns of  $Ce_xSi_yO_2$  from (a)  $20^\circ - 100^\circ$  and (b) magnified spectra between  $26^\circ - 32^\circ$ . The Miller indices of  $CeO_2$  were referenced to JCPDS: 01-083-9465. The XRD patterns of (c) reduced and passivated  $Ni/Ce_xSi_yO_2$  were recorded from  $20^\circ - 100^\circ$ ; JCPDS: 04-016-4592 (Ni).

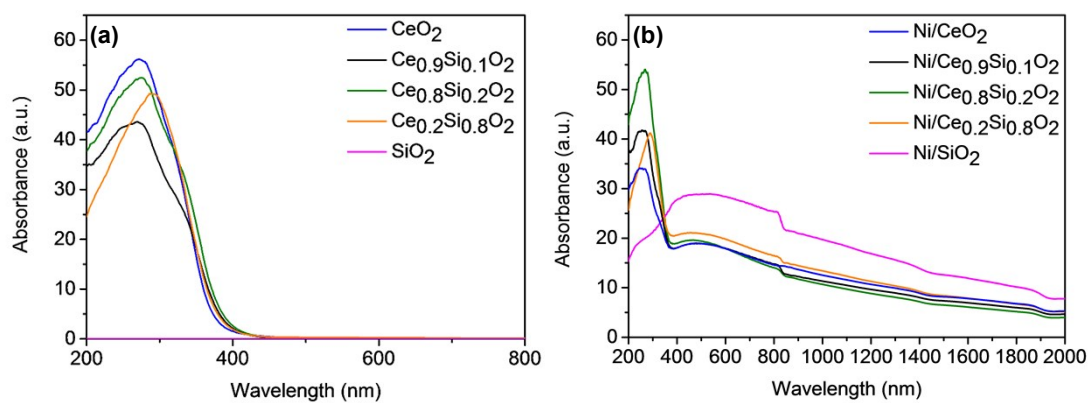

**Figure S2** (a) UV-vis absorbance of  $Ce_xSi_yO_2$  from 200 – 800 nm. (b) UV-vis-NIR absorbance of reduced and passivated  $Ni/Ce_xSi_yO_2$  from 200 – 2000 nm. The absorption peak at 830 nm is due to the instrument.

**Table S1** Actual Ni loading as determined from ICP-OES of as-prepared Ni/Ce<sub>x</sub>Si<sub>y</sub>O<sub>2</sub>. The Ni catalysts have a nominal loading of 10 wt.%.

| Catalyst                                              | Actual Ni loading (wt.%) |
|-------------------------------------------------------|--------------------------|
| Ni/CeO <sub>2</sub>                                   | 8.7                      |
| Ni/Ce <sub>0.9</sub> Si <sub>0.1</sub> O <sub>2</sub> | 9.7                      |
| Ni/Ce <sub>0.8</sub> Si <sub>0.2</sub> O <sub>2</sub> | 10.1                     |
| Ni/Ce <sub>0.2</sub> Si <sub>0.8</sub> O <sub>2</sub> | 9.4                      |
| Ni/SiO <sub>2</sub>                                   | 9.1                      |

Thermogravimetric analysis of SiO<sub>2</sub> was performed on a TGA Q5000 (TA instruments) under a flow of dry compressed air from 50 °C – 800 °C, ramped at 20 °C/min. The SiO<sub>2</sub> (~ 2 mg) was analysed using a platinum pan. SiO<sub>2</sub> was selected for TGA analysis as it had the highest specific surface area where any weight loss from residual carbon is most likely to be observed. The TGA shows ≈ 6% up to 500 °C (due to water and dehydroxylation) with negligible loss observed > 500 °C. The catalysts were all calcined at 400 °C and reduced at 500 °C. The weight loss difference between 400 °C – 500 °C is ≈ 0.5%. Hence, the catalyst preparation conditions reached temperatures beyond the point where any further mass loss occurred. However, the presence of carbon species on the catalyst surface due to adsorption upon exposure to the atmosphere is likely. XPS C 1s spectra show that carbon species were present on the catalyst surface, which may originate from the atmospheric adsorption (**Figure S6**).

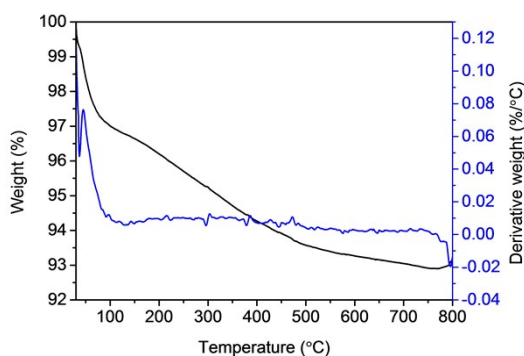

**Figure S3** Thermogravimetric analysis of SiO<sub>2</sub> showing weight loss over the range 50 °C – 800 °C

Defects and oxygen vacancies were identified using electron paramagnetic resonance (EPR) on a Bruker EMX X-Band ESR Spectrometer operated at frequency of approximately 9.43 GHz. The samples (20 mg) were loaded into a 4 mm (internal diameter) quartz tube and characterised at  $-153\text{ }^{\circ}\text{C}$ , with the system cooled by liquid nitrogen. Raman spectra were collected at 25 MW using a 514 nm laser on a Renishaw inVia Raman Microscope.

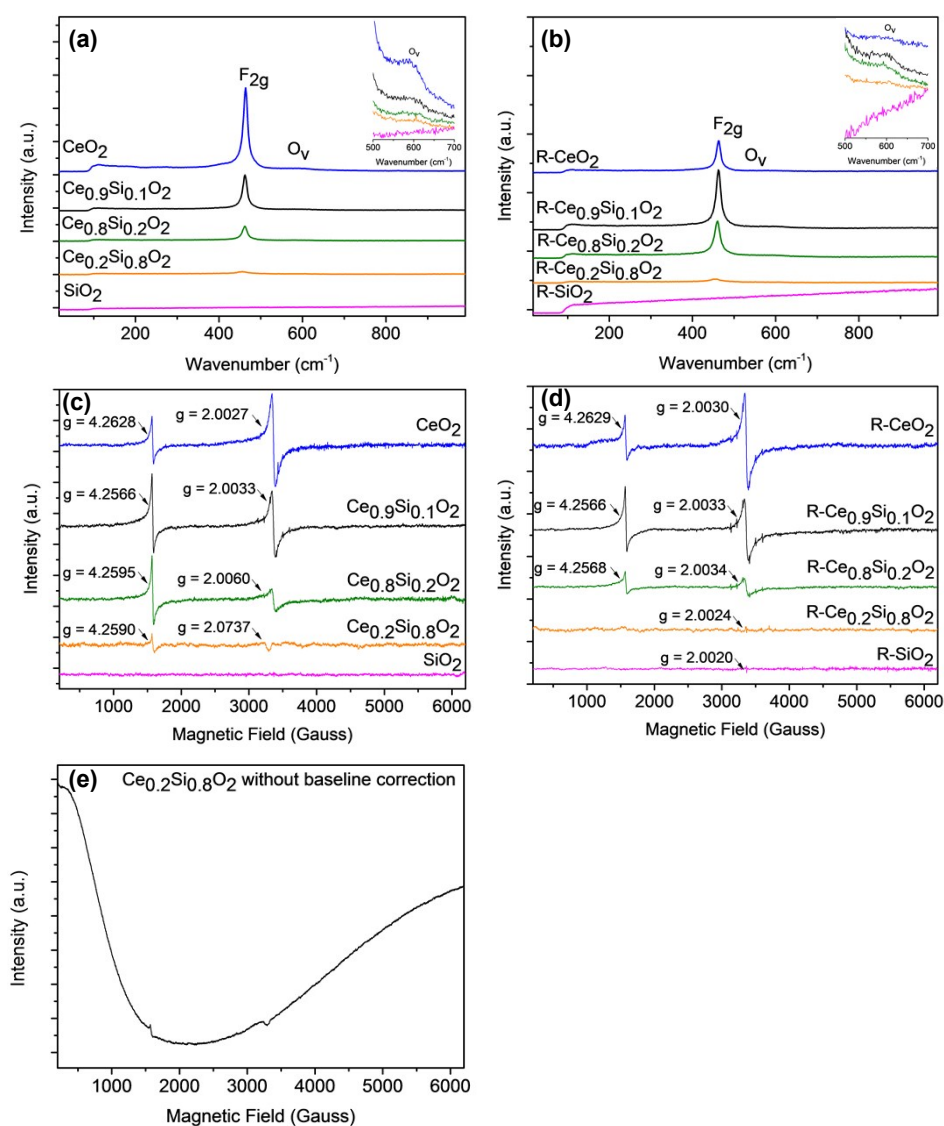

**Figure S4** Raman spectra of (a) as-prepared and (b) reduced  $\text{Ce}_x\text{Si}_y\text{O}_2$ . Inset shows magnified spectra over the range  $500 - 700\text{ cm}^{-1}$ . Peak at approximately  $464\text{ cm}^{-1}$  corresponds to the  $\text{F}_{2g}$  mode of  $\text{CeO}_2$  (symmetrical stretching of Ce-O) while the broad peak between  $500\text{ cm}^{-1}$  to  $600\text{ cm}^{-1}$  confirms the presence of oxygen vacancies.<sup>1-5</sup> EPR spectra of (c) as-prepared  $\text{Ce}_x\text{Si}_y\text{O}_2$ , (d) reduced  $\text{Ce}_x\text{Si}_y\text{O}_2$  and (e)  $\text{Ce}_{0.2}\text{Si}_{0.8}\text{O}_2$  without baseline correction, only observed for as-prepared and reduced  $\text{Ce}_{0.2}\text{Si}_{0.8}\text{O}_2$ .

Fourier-transform infrared (FTIR) spectra were collected using a Spotlight 400 FTIR (PerkinElmer) from 600 – 4000  $\text{cm}^{-1}$  under ambient conditions with scan resolution of 4  $\text{cm}^{-1}$  with 8 scans per spectrum.

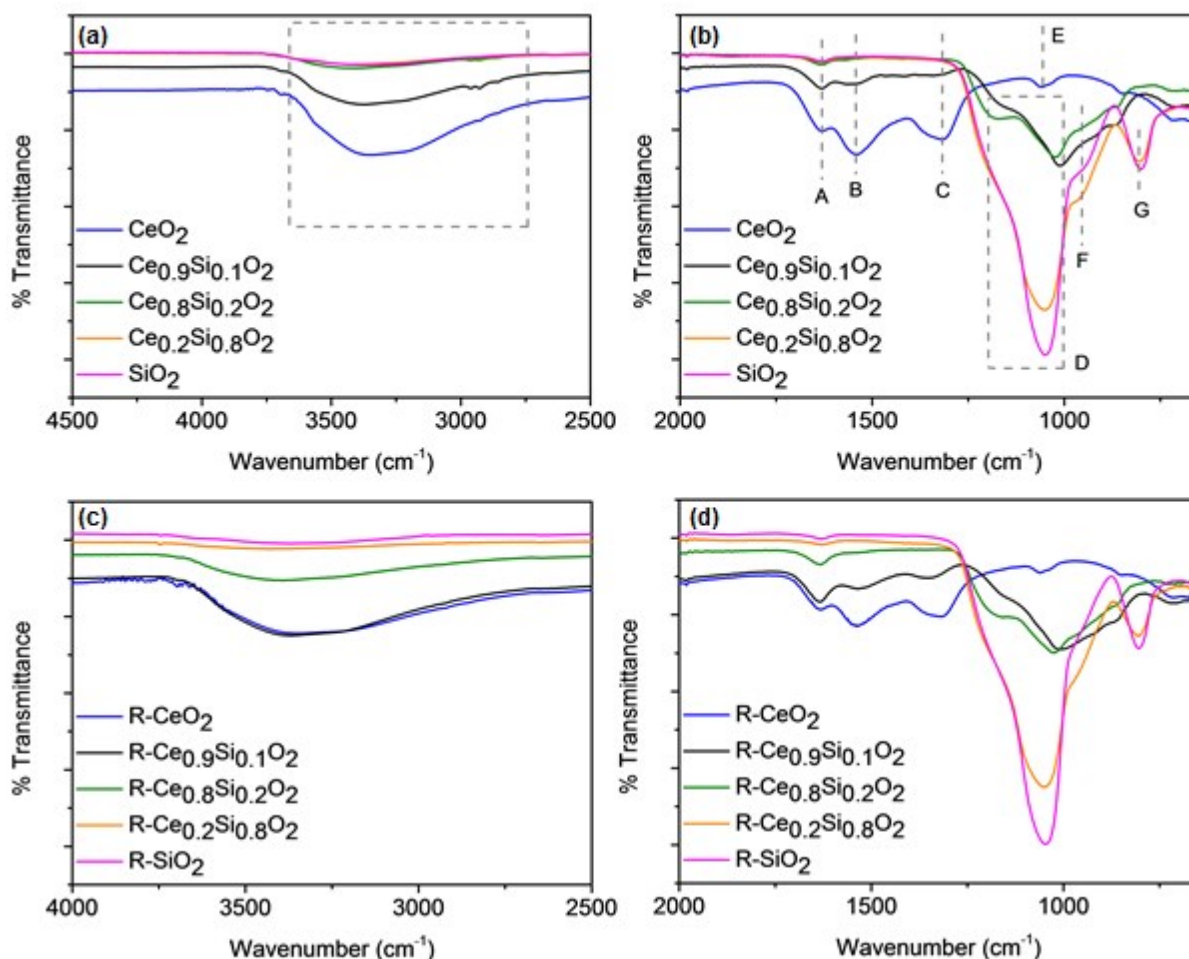

**Figure S5** FTIR spectra of as-prepared and reduced (R)  $\text{Ce}_x\text{Si}_y\text{O}_2$  from (a,c) 4500 - 2500  $\text{cm}^{-1}$  and (b,d) 2000 – 650  $\text{cm}^{-1}$ , respectively. The broad peak region between 3750  $\text{cm}^{-1}$  – 2750  $\text{cm}^{-1}$  for both  $\text{CeO}_2$  and  $\text{SiO}_2$  indicate water adsorption.<sup>1,6,7</sup> In the  $\text{CeO}_2$  spectrum, the peak at 1319  $\text{cm}^{-1}$  (C) corresponds to stretching vibrational mode Ce-O-Ce<sup>8</sup>, the peak at 1628  $\text{cm}^{-1}$  (A) is attributed to the O-H deformation vibration<sup>8</sup>. The  $\text{SiO}_2$  sampled exhibited peaks at (D) 1049  $\text{cm}^{-1}$ , asymmetric stretch (Si-O-Si), and (G) 801  $\text{cm}^{-1}$ , symmetric stretch (Si-O-Si).<sup>7</sup>

The oxidation states and shifts in binding energies of the elements present in the reduced and passivated Ni catalysts were studied via X-ray photoelectron spectroscopy (XPS) using an ESCALAB 250Xi (Thermo Scientific) with an Al K $\alpha$  X-ray source. The binding energies of the spectra were referenced to carbon 1s at 284.8 eV. For insights into the catalyst surface properties, XPS spectra for Ni 2p, Ce 3d, and Si 2p of the reduced and passivated catalysts are shown in **Figure S6**. The Ni 2p spectra in **Figure S6a** indicates that, with an increase in SiO<sub>2</sub> concentration, the ratio of Ni<sup>2+</sup> (attributed to NiO)<sup>9,10</sup> and Ni<sup>0</sup> (attributed to metallic Ni)<sup>9,10</sup> decreases. Thus, the presence of SiO<sub>2</sub> resulted in a greater presence of metallic Ni. The Ce 3d spectra in **Figure S6b** show that the ratio of Ce<sup>4+</sup>/Ce<sup>3+</sup> is similar across all samples: Ni/CeO<sub>2</sub>: 3.71, Ni/Ce<sub>0.9</sub>Si<sub>0.1</sub>O<sub>2</sub>: 4.10, Ni/Ce<sub>0.8</sub>Si<sub>0.2</sub>O<sub>2</sub>: 3.81, Ni/Ce<sub>0.2</sub>Si<sub>0.8</sub>O<sub>2</sub>: 4.23. The comparable oxidation state of Ce can be influenced by the oxygen passivation, after hydrogen reduction, in the catalyst pretreatment. The Si 2p spectra are provided in **Figure S6c**. Using the pretreated Ni/SiO<sub>2</sub> as reference, the peak at 104.1 eV can be attributed to Si in SiO<sub>2</sub>. With the addition of CeO<sub>2</sub>, a shift to lower binding energy is observed. It is also apparent that further increases in CeO<sub>2</sub> concentration result in corresponding increases in the binding energy. The increase can indicate interaction between the CeO<sub>2</sub> and SiO<sub>2</sub>. A similar shift to higher binding energy was also observed in the XPS peaks for oxygen. The binding energy of both silicon and oxygen increase with the addition of CeO<sub>2</sub>.

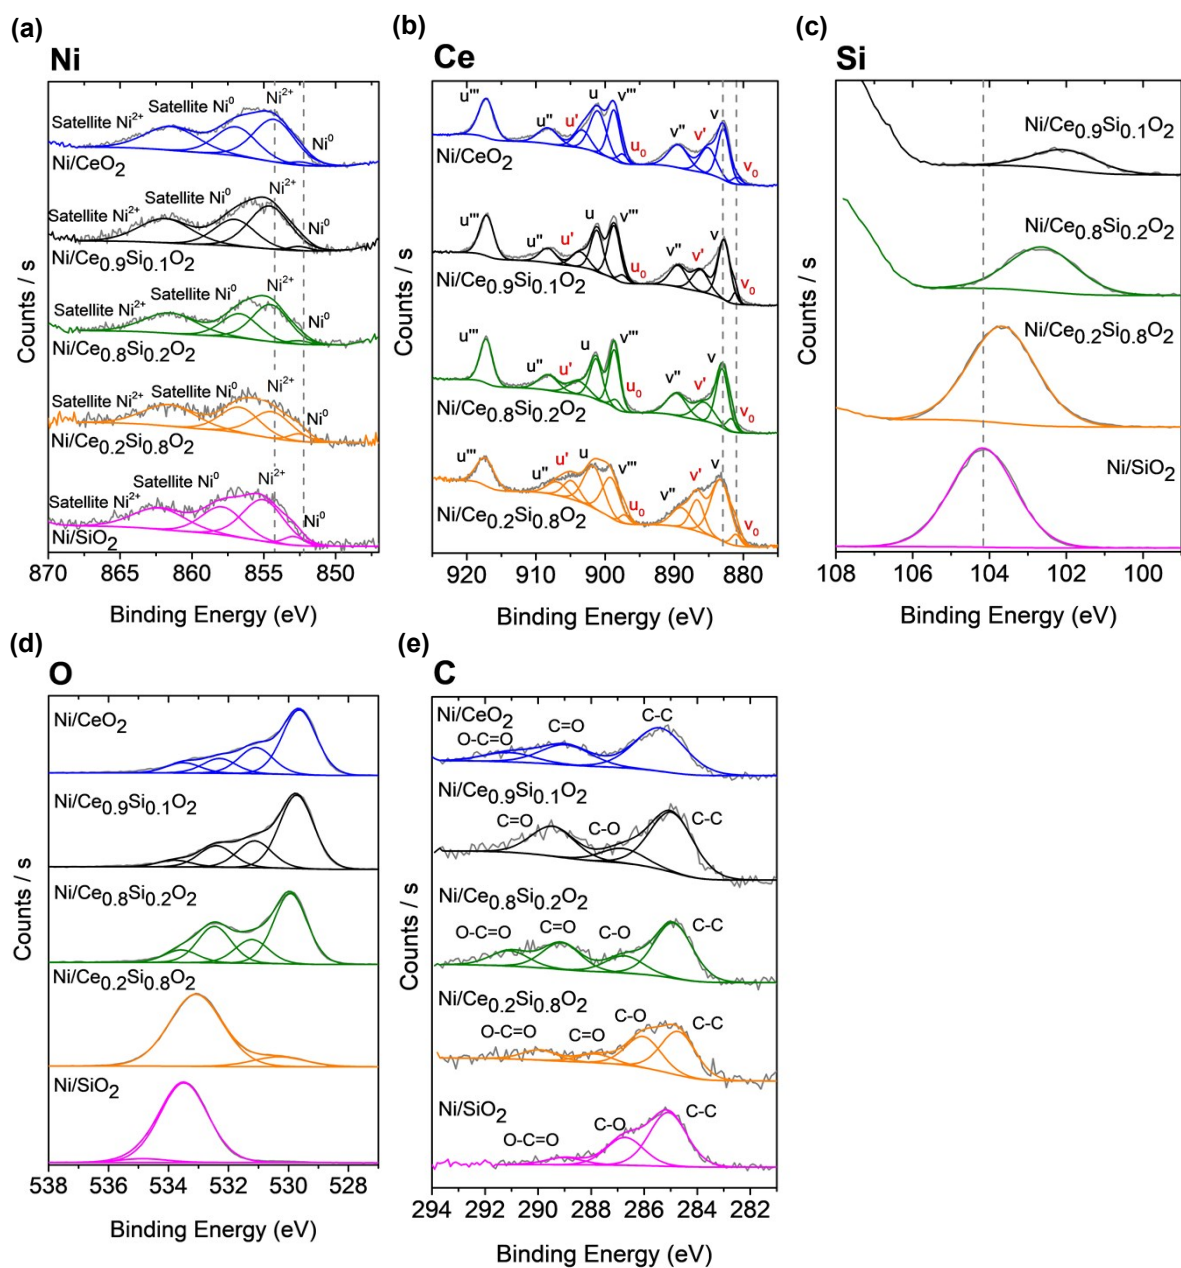

**Figure S6** XPS spectra of (a) Ni 2p; (b) Ce 3d; (c) Si 2p; (d) O 1s; and (e) C 1s for  $\text{Ni/Ce}_x\text{Si}_y\text{O}_2$ . With respect to the Ce 3d peaks,  $\text{Ce}^{3+}$  (red labels) are represented by  $u^0/v^0$  and  $u^1/v^1$ ;  $\text{Ce}^{4+}$  (black labels) are represented by  $u/v$ ,  $u''/v''$ , and  $u'''/v'''$ .<sup>11,12</sup> The  $\text{Ni/Ce}_x\text{Si}_y\text{O}_2$  were reduced and passivated prior to analysis. The deconvolutions of O 1s<sup>13,14</sup> and C 1s<sup>9,15,16</sup> were referenced to literature.



### **The role of light in photothermal methanation**

The carbon balance can be derived from the decoupled light and heat catalytic activity under continuous flow conditions. The balance was calculated as follows:

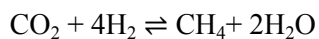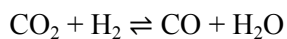

The mol ratios of  $\text{CO}_2:\text{CH}_4$  and  $\text{CO}_2:\text{CO}$  were 1:1 for both reactions. So as to demonstrate that carbon accumulation does not occur in the reaction, a sample case of the carbon balance is included. The flowrate of inlet  $\text{CO}_2 = 4 \text{ mL/min} = 0.164 \text{ mmol/min}$  and theoretically, the  $\text{CH}_4$  outlet flowrate would be  $0.164 \text{ mmol/min}$  for 100%  $\text{CO}_2$  conversion and  $\text{CH}_4$  selectivity with no accumulation. Under thermal conditions, the  $\text{CO}_2$  conversion of  $\text{Ni/CeO}_2$  was 61.6% with  $\text{CH}_4$  and  $\text{CO}$  selectivity of 97.3% and 2.7%, respectively at  $400 \text{ }^\circ\text{C}$ . The molar flowrate of  $\text{CO}_2$  at the outlet stream was calculated to  $0.0631 \text{ mmol/min}$ , based on  $\text{CO}_2$  calibration. The product formation of  $\text{CH}_4$  and  $\text{CO}$  were  $0.0985 \text{ mmol/min}$  and  $0.0027 \text{ mmol/min}$ , respectively. Therefore, the carbon balance was close to 100%. Additionally, carbon accumulation in the system was not observed and characterisation of selected spent catalyst indicated negligible change.

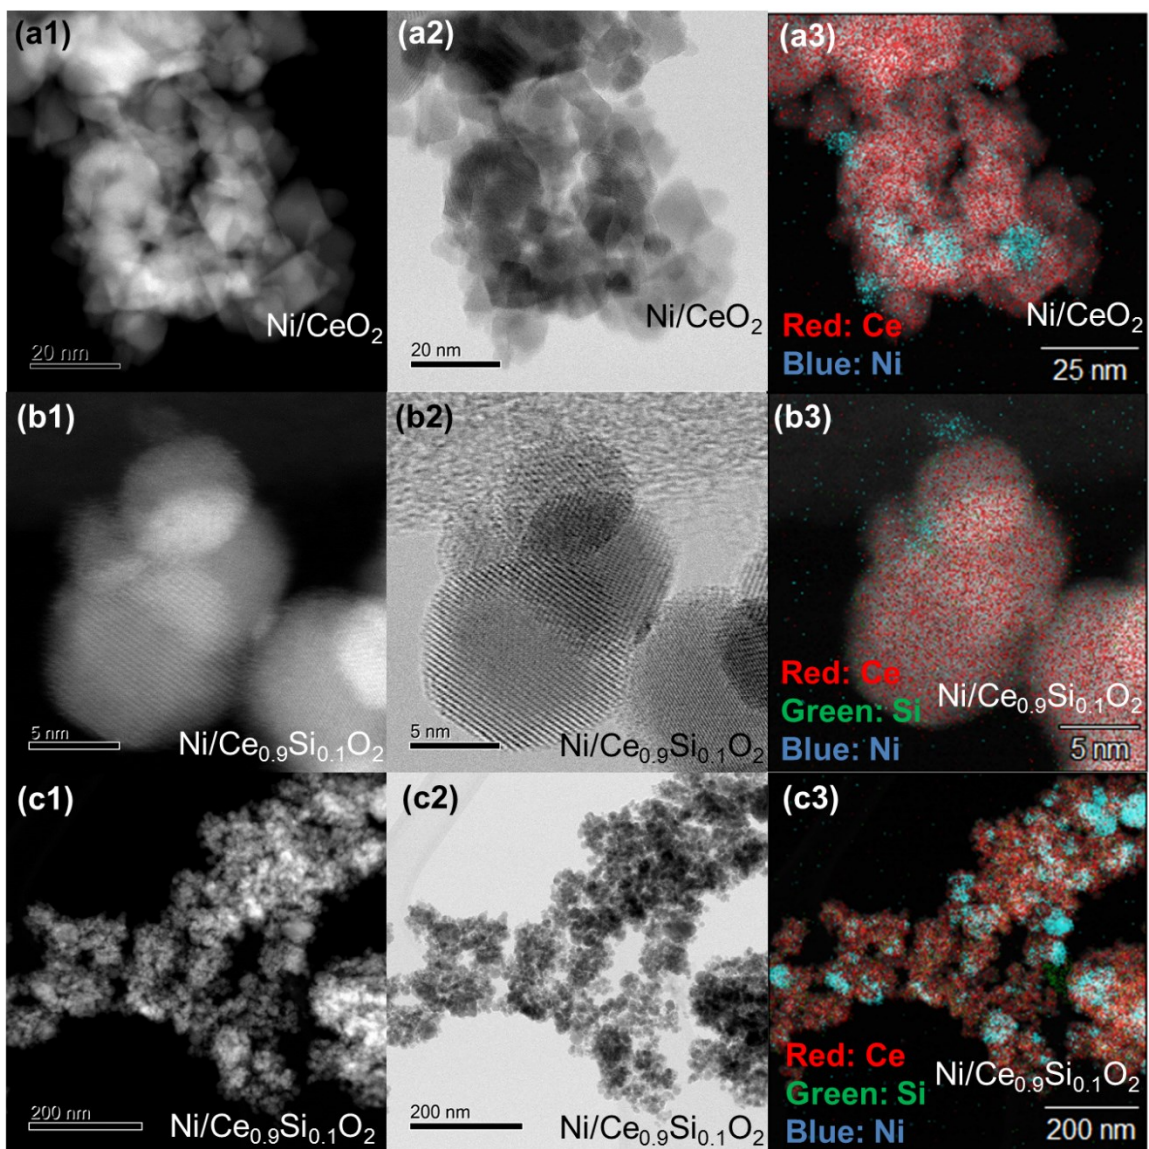

**Figure S7** TEM and EDS images of (a) Ni/CeO<sub>2</sub> and (b-c) Ni/Ce<sub>0.9</sub>Si<sub>0.1</sub>O<sub>2</sub>. The figures include (1) dark field images, (2) bright field images, and (3) EDS mapping.

**Table S2** Crystallite size of Ni and catalyst support for reduced and passivated and selected spent catalysts. The spent catalysts were collected after the decoupled activity tests under flow conditions.

| Catalyst                               | Support (nm) | Ni (nm) |
|----------------------------------------|--------------|---------|
| Ni/CeO <sub>2</sub>                    | 12.2         | 13.8    |
| Photo and Thermal: Ni/CeO <sub>2</sub> | 12.4         | 12.2    |
| Ni/SiO <sub>2</sub>                    | N/A          | 15.0    |
| Thermal: Ni/SiO <sub>2</sub>           | N/A          | 15.8    |
| Photo and Thermal: Ni/SiO <sub>2</sub> | N/A          | 14.4    |

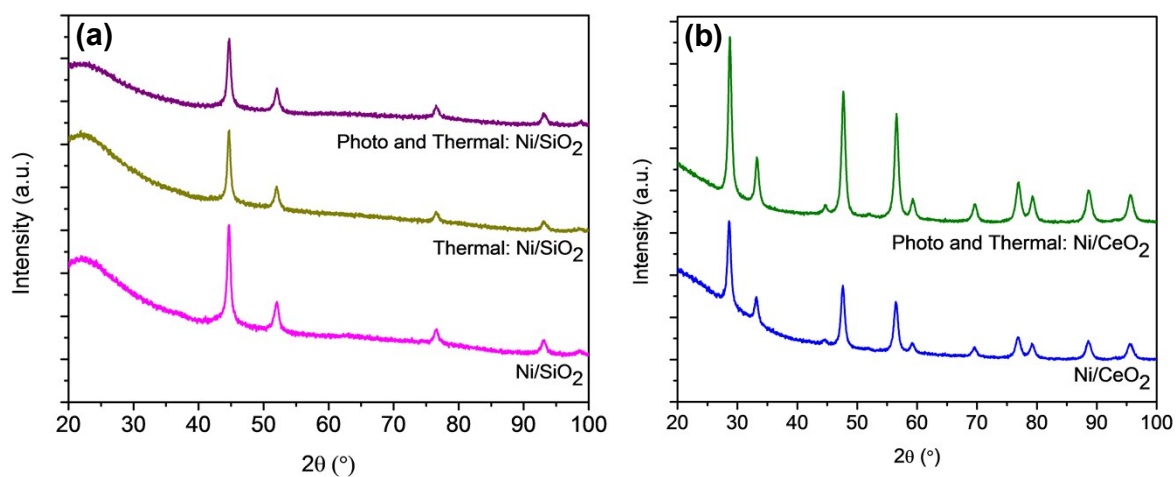

**Figure S8** XRD pattern of (a) Ni/SiO<sub>2</sub> and (b) Ni/CeO<sub>2</sub>. The spent catalysts were collected after the decoupled activity tests (i) thermal and ii) photo and thermal) under flow conditions. The reduced and passivated catalysts (Ni/CeO<sub>2</sub> and Ni/SiO<sub>2</sub>) are included for comparison.

Exploring the different pathways over  $\text{Ni/Ce}_x\text{Si}_y\text{O}_2$  via DRIFTS

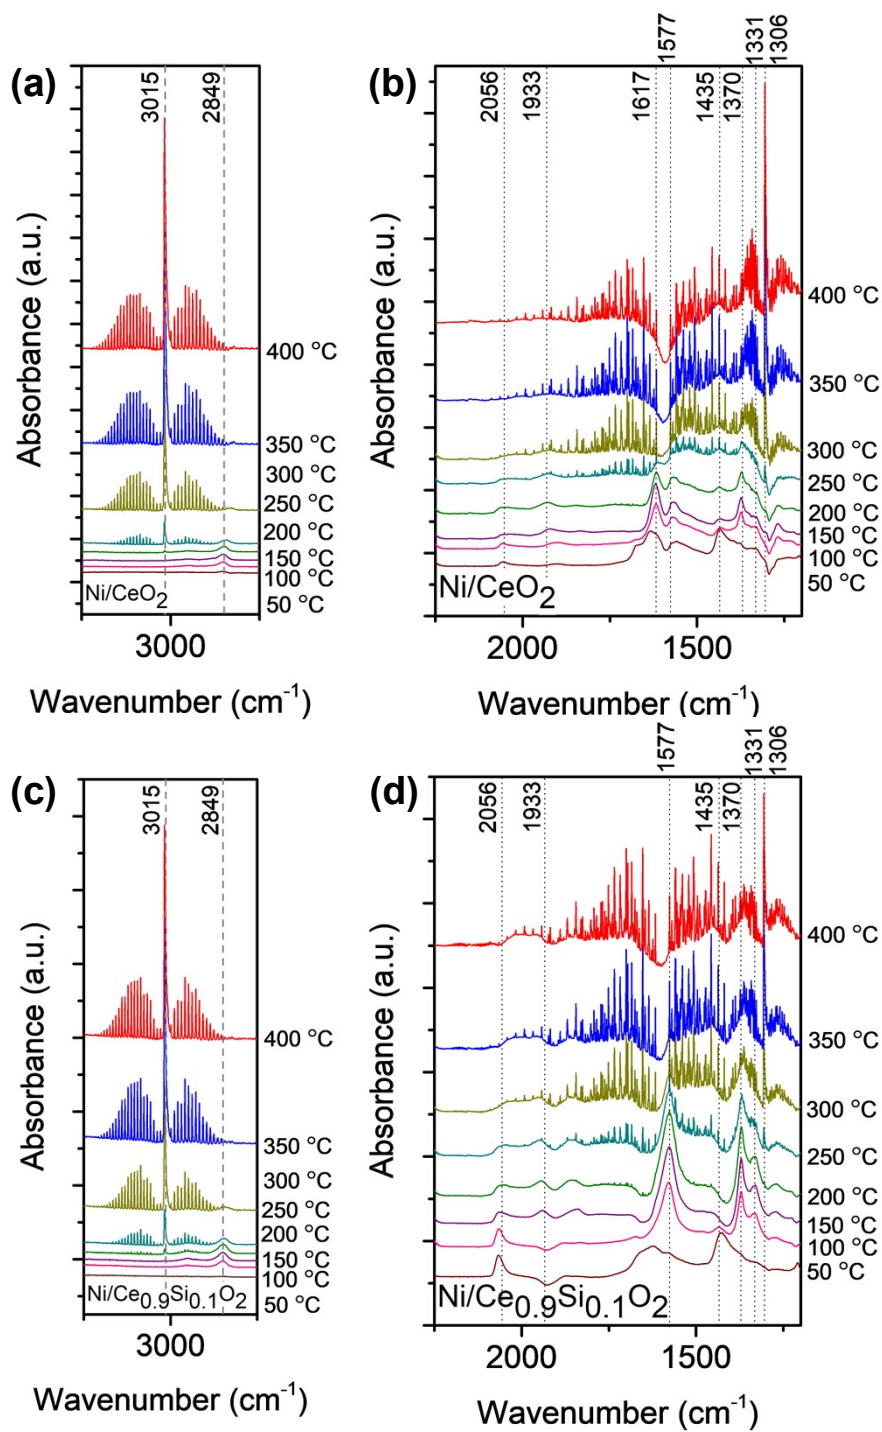

**Figure S9** DRIFTS spectra from 50 °C – 400 °C for  $\text{Ni/CeO}_2$  and  $\text{Ni/Ce}_{0.9}\text{Si}_{0.1}\text{O}_2$  from (a, c) 4000 – 2750  $\text{cm}^{-1}$  and (b, d) 2250 – 1200  $\text{cm}^{-1}$ .

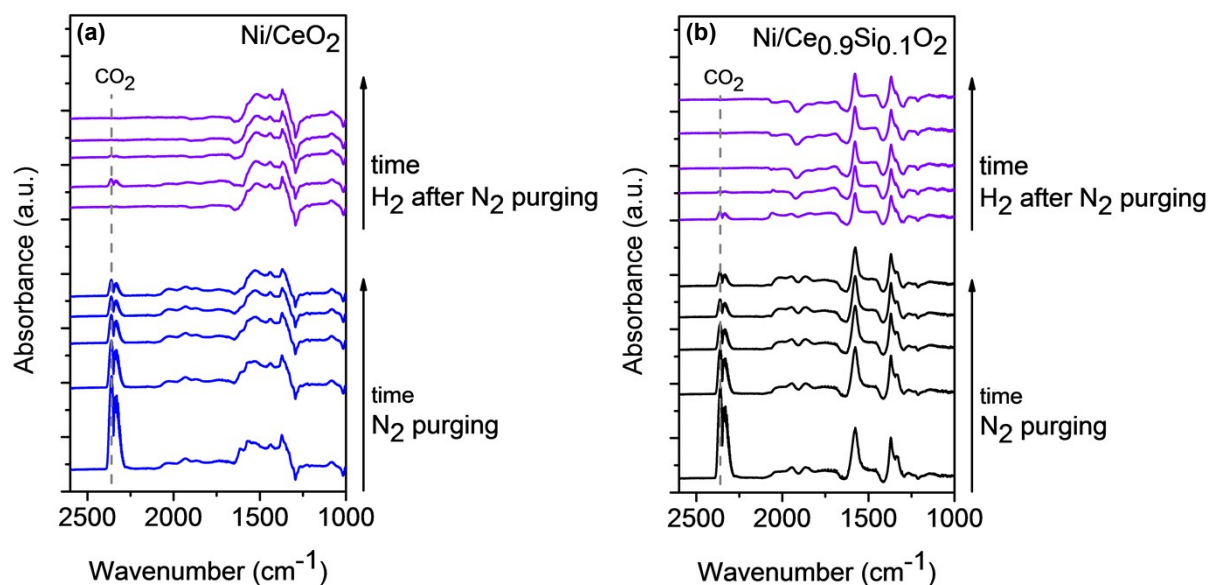

**Figure S10** DRIFTS transient spectra of (a)  $\text{Ni/CeO}_2$  and (b)  $\text{Ni/Ce}_{0.9}\text{Si}_{0.1}\text{O}_2$  at 200 °C under  $\text{N}_2$  purging and  $\text{H}_2$  flow after  $\text{N}_2$  purge (purple lines) from 2600 – 1000  $\text{cm}^{-1}$ . The spectra include the first five minutes of the gas transition stage. The  $\text{CO}_2$  peak intensity and hydrogen carbonate peak (1617  $\text{cm}^{-1}$ ) of (a)  $\text{Ni/CeO}_2$  decrease under  $\text{N}_2$ . In the case of (b)  $\text{Ni/Ce}_{0.9}\text{Si}_{0.1}\text{O}_2$ , intermediates were retained under the  $\text{N}_2$  purge.

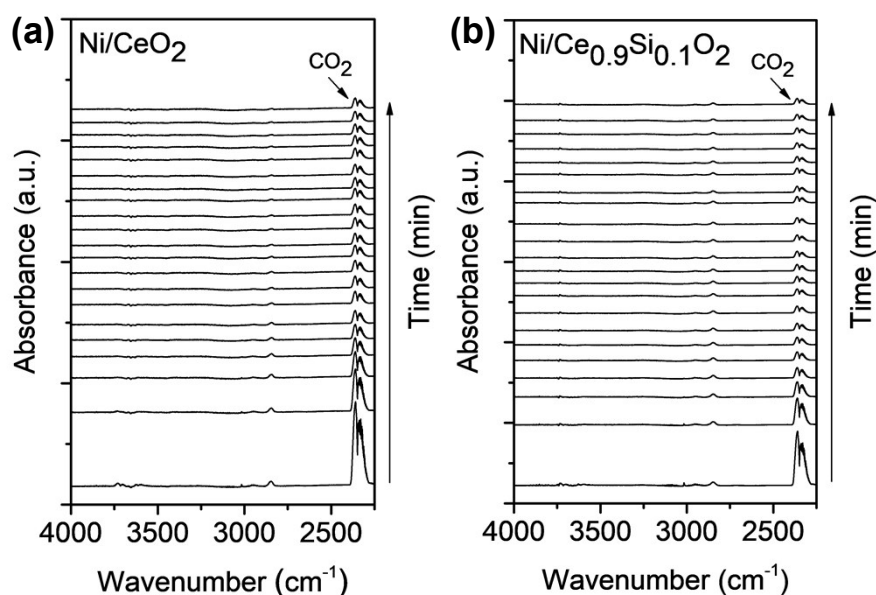

**Figure S11** DRIFTS transient spectra at 200 °C under  $\text{N}_2$  purging at 4000 – 2250  $\text{cm}^{-1}$  for (a)  $\text{Ni/CeO}_2$  and (b)  $\text{Ni/Ce}_{0.9}\text{Si}_{0.1}\text{O}_2$  collected under 1 min intervals. A decrease in  $\text{CO}_2$  intensity of both samples were observed with time increase.

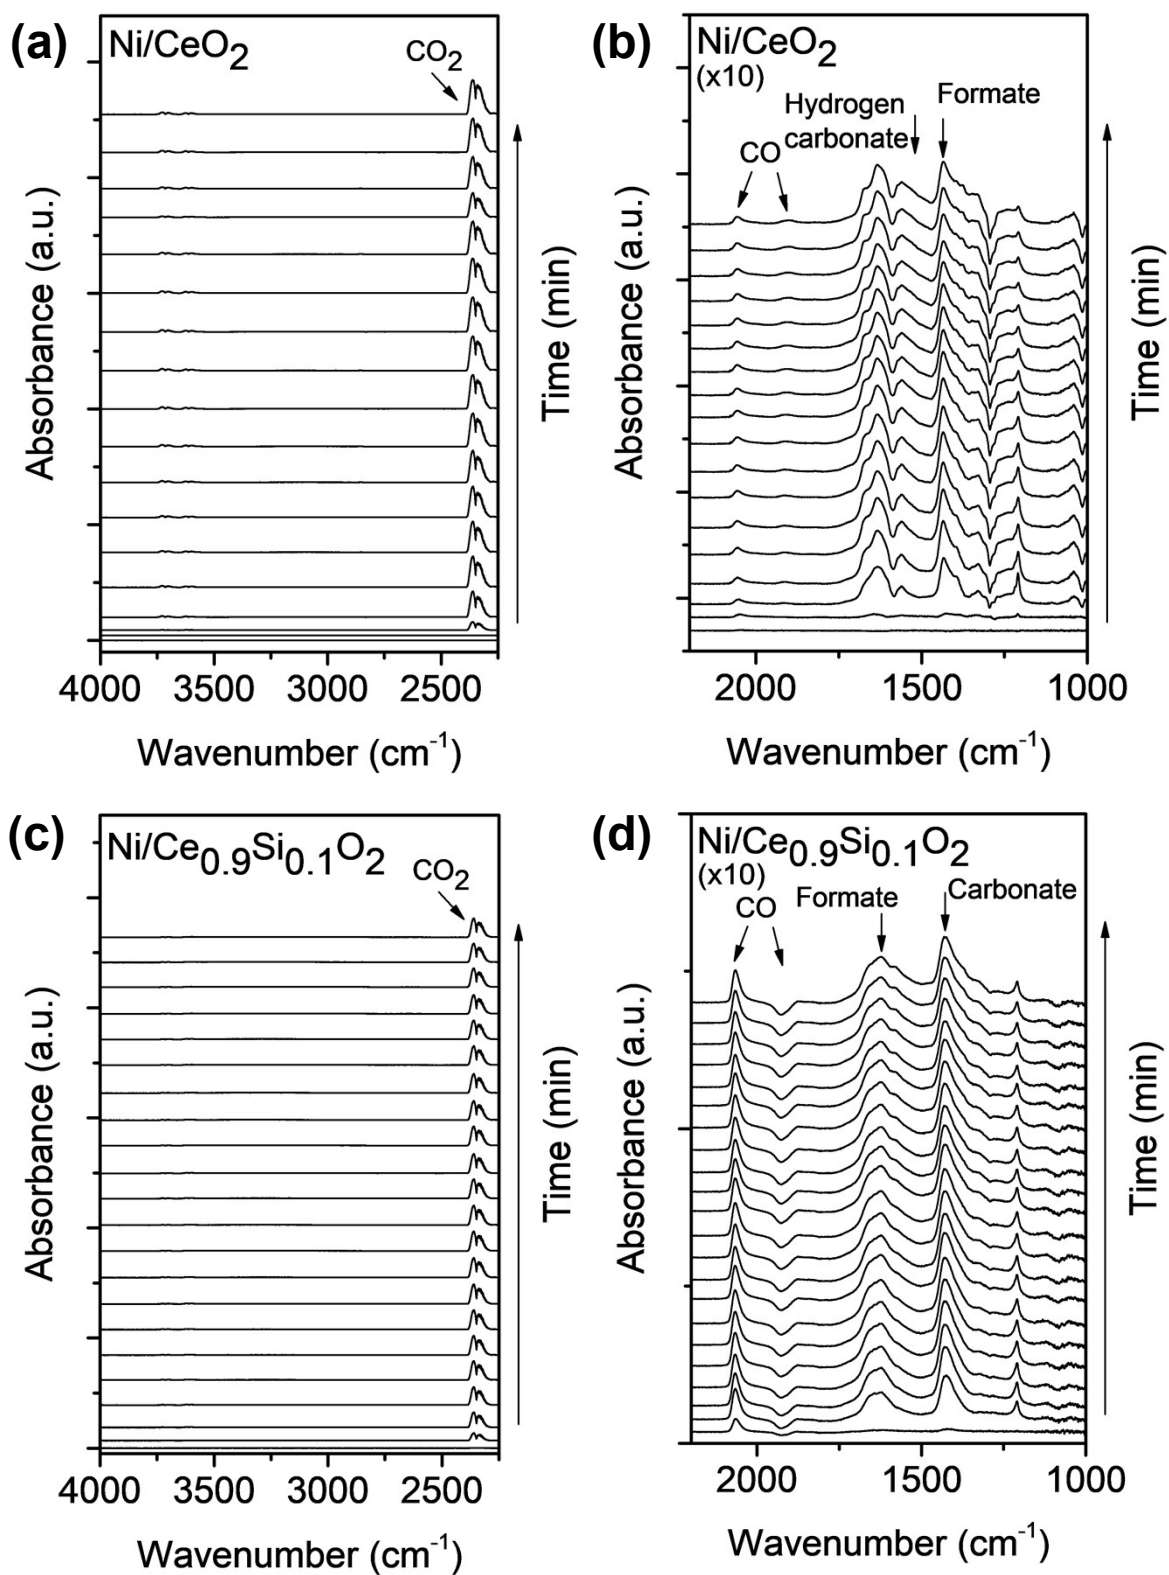

**Figure S12**  $\text{Ni/CeO}_2$  and  $\text{Ni/Ce}_{0.9}\text{Si}_{0.1}\text{O}_2$ : DRIFTS transient spectra at 50 °C after introduction of  $\text{CO}_2$  and  $\text{H}_2$  at ratio of 1:4, diluted with  $\text{N}_2$  (a,c) 4000 – 2250  $\text{cm}^{-1}$  and (b,d) 2200 – 1000  $\text{cm}^{-1}$ . The spectra was collected under 1 min intervals.

## References

- 1 S. Vivek, P. Arunkumar and K. S. Babu, *RSC Adv.*, 2016, **6**, 45947–45956.
- 2 B. M. Reddy, A. Khan, P. Lakshmanan, M. Aouine, S. Loidant and J. C. Volta, *J. Phys. Chem. B*, 2005, **109**, 3355–3363.
- 3 N. S. Arul, D. Mangalaraj and J. I. Han, *J. Mater. Sci. Mater. Electron.*, 2015, **26**, 1441–1448.
- 4 A. G. M. da Silva, H. V. Fajardo, R. Balzer, L. F. D. Probst, N. T. Prado, P. H. C. Camargo and P. A. Robles-Dutenhefner, *Chem. Eng. J.*, 2016, **286**, 369–376.
- 5 B. Liu, C. Li, G. Zhang, X. Yao, S. S. C. Chuang and Z. Li, *ACS Catal.*, 2018, **8**, 10446–10456.
- 6 A. N. Murashkevich, A. S. Lavitskaya, T. I. Barannikova and I. M. Zharskii, *J. Appl. Spectrosc.*, 2008, **75**, 730–734.
- 7 K. M. S. Khalil, L. A. Elkabee and B. Murphy, *J. Colloid Interface Sci.*, 2005, **287**, 534–541.
- 8 G. Bai, J. Wang, Z. Yang, H. Wang, Z. Wang and S. Yang, *RSC Adv.*, 2014, **4**, 47096–47105.
- 9 M. Gaboardi, A. Bliersbach, G. Bertoni, M. Aramini, G. Vlahopoulou, D. Pontiroli, P. Maunon, G. Magnani, G. Salviati, A. Züttel and M. Riccò, *J. Mater. Chem. A*, 2014, **2**, 1039–1046.
- 10 N. Wang, W. Qian, W. Chu and F. Wei, *Catal. Sci. Technol.*, 2016, **6**, 3594–3605.
- 11 G. Hua, L. Zhang, G. Fei and M. Fang, *J. Mater. Chem.*, 2012, **22**, 6851–6855.
- 12 L. Katta, P. Sudarsanam, B. Malleshham and B. M. Reddy, *Catal. Sci. Technol.*, 2012, **2**, 995–1004.
- 13 E. C. Lovell, J. Horlyck, J. Scott and R. Amal, *Appl. Catal. A Gen.*, 2017, **546**, 47–57.
- 14 X. Liao, Y. Zhang, M. Hill, X. Xia, Y. Zhao and Z. Jiang, *Appl. Catal. A, Gen.*, 2014, **488**, 256–264.

- 15 Y. Liu, Z. Wang, H. Zeng, C. Chen, J. Liu, L. Sun and W. Wang, *Mater. Lett.*, 2015, **142**, 280–282.
- 16 N. Díez, A. Śliwak, S. Grylewicz, B. Grzyb and G. Grylewicz, *RSC Adv.*, 2015, **5**, 81831–81837.
